# Supplementary material for: Characteristics and mechanism of electrochemical peroxymonosulfate activation by a Co–N@CF anode for pollutant removal
Source: Royal Society of Chemistry journal article supplement (doi:10.1039/d1ew00676b), 2021-11-08
Supplement: d1ew00676b1.pdf [file d1ew00676b1.pdf]

## Supplementary information

# The characteristics and mechanism of electrochemical peroxymonosulfate activation by Co-N@CF anode for pollutant removal

Ping Lin<sup>a, b</sup>, Weihuang Zhu<sup>a, b, \*</sup>, Ying Gao<sup>a, b</sup>, Junli Li<sup>a, b</sup>, Jiawu Liu<sup>a, b</sup>, Jianfeng Zhang<sup>a, b</sup>,  
Tinglin Huang<sup>a, b</sup>

<sup>a</sup> Key Laboratory of Northwest Water Resources, Environment and Ecology, Ministry of Education, Xi'an University of Architecture and Technology, Xi'an 710055, China

<sup>b</sup> Shaanxi Key Laboratory of Environmental Engineering, Xi'an University of Architecture and Technology, Xi'an 710055, China

### Corresponding authors.

E-mail addresses: [zhuweihuang@xauat.edu.cn](mailto:zhuweihuang@xauat.edu.cn) (W. Zhu),

## Text S1

The electricity energy consumption was estimated by EE/O which was calculated according to following equation:

$$\frac{EE}{O} = \frac{1000Pt}{60V \lg \frac{C_0}{C_t}}$$

Where P is the actual power of current generator (kW), t is the reaction time (min), V is the volume of reaction liquid (L), C<sub>0</sub> is the initial concentration of TC, C<sub>t</sub> is the concentration of TC at selected reaction time.

## Text S2

The activation energy of EC/Co-N@CF and Co-N@CF processes were calculated according Arrhenius formula:

$$\ln k = -\frac{E_a}{RT} + A$$

Where  $k$  is kinetic constants at different temperature,  $E_a$  was activation energy,  $R$  is gas constant which was  $8.314 \text{ Jmol}^{-1}\text{k}^{-1}$ ,  $T$  was thermodynamic temperature,  $A$  is the temperature-independent factor.

**Table S1** Element content comparison between Co-N@CF and bare CF.

| Anodes  | C      | N      | O      | Co    |
|---------|--------|--------|--------|-------|
| Bare CF | 48.55% | 0      | 51.45% | 0     |
| Co-N@CF | 57.71% | 15.76% | 19.2%  | 7.33% |

**Table S2** Comparison of electrochemical activation of PMS towards pollutants removal by different processes.

| PMS activator                             | The pollutant and its initial concentration | Degradation efficiency | PMS (mM) | Current density/Voltage  | EE/O (kWh.m <sup>-3</sup> ) | Reaction Time | Reference |
|-------------------------------------------|---------------------------------------------|------------------------|----------|--------------------------|-----------------------------|---------------|-----------|
| Cathode: ACF                              | 0.042 mM CBZ                                | 100%                   | 50       | 28.6 mA.cm <sup>-2</sup> | 1.89                        | 40 min        | 1         |
| Anode: BDD                                | 0.005 mM SMX                                | 84.67%                 | 1        | 5.0 mA.cm <sup>-2</sup>  | 6.16                        | 30 min        | 2         |
| Anode: Ti/SnO <sub>2</sub> -Sb            | 50 mg/L PFDA                                | 92.7%                  | 5        | 10.0 mA.cm <sup>-2</sup> | 37.46                       | 90 min        | 3         |
| Cathode: NiCo <sub>2</sub> O <sub>4</sub> | 100 mg/L RhB                                | 99.7%                  | 32.5     | 10.0 mA.cm <sup>-2</sup> | /                           | 60 min        | 4         |
| Anode: iron sheet                         | 200 mg/L DNP                                | 63.4%                  | 5        | 4.0 mA.cm <sup>-2</sup>  | 0.0336                      | 15 min        | 5         |
| Anode: Co-N@CF                            | 44.4 mg/L TC                                | 92.2%                  | 0.4      | 1.0 mA.cm <sup>-2</sup>  | 0.072                       | 60 min        | This work |

**Table S3** Scavenger reagents and reaction rate constants with various radicals.

|             | OH <sup>•</sup>                                                | SO <sub>4</sub> <sup>•-</sup>                                    | O <sub>2</sub> <sup>•-</sup>                                      | <sup>1</sup> O <sub>2</sub>                                      |
|-------------|----------------------------------------------------------------|------------------------------------------------------------------|-------------------------------------------------------------------|------------------------------------------------------------------|
| TBA         | 6×10 <sup>8</sup> M <sup>-1</sup> S <sup>-1</sup> <sup>6</sup> | 7.6×10 <sup>5</sup> M <sup>-1</sup> S <sup>-1</sup> <sup>7</sup> | Not available                                                     | 1.8×10 <sup>3</sup> M <sup>-1</sup> S <sup>-1</sup> <sup>8</sup> |
| L-Histidine | Not available                                                  | Not available                                                    | Not available                                                     | 3.2×10 <sup>8</sup> M <sup>-1</sup> S <sup>-1</sup> <sup>9</sup> |
| p-BQ        | Not available                                                  | Not available                                                    | 9.0×10 <sup>8</sup> M <sup>-1</sup> S <sup>-1</sup> <sup>10</sup> | Not available                                                    |
| MeOH        | 9.7×10 <sup>8</sup> M <sup>-1</sup> S <sup>-1</sup>            | 2.7×10 <sup>7</sup> M <sup>-1</sup> S <sup>-1</sup>              | Not available                                                     | Not available                                                    |

**Table S4** The kinetic constants and regression coefficients of TC degradation with various scavengers.

| Quencher                                      | Concentration(mM) | Kinetic constant (min <sup>-1</sup> ) | R <sup>2</sup> |
|-----------------------------------------------|-------------------|---------------------------------------|----------------|
| TBA                                           | 0                 | 0.11799                               | 0.97593        |
|                                               | 10                | 0.04799                               | 0.96484        |
|                                               | 50                | 0.02947                               | 0.99194        |
|                                               | 100               | 0.01533                               | 0.99964        |
| p-BQ                                          | 0                 | 0.11799                               | 0.97593        |
|                                               | 0.1               | 0.03227                               | 0.98850        |
|                                               | 0.5               | 0.02184                               | 0.99490        |
|                                               | 1                 | 0.01578                               | 0.95264        |
|                                               | 2                 | 0.01993                               | 0.96736        |
|                                               | 0                 | 0.11799                               | 0.97593        |
| L-Histidine                                   | 0.1               | 0.06721                               | 0.95679        |
|                                               | 0.5               | 0.05409                               | 0.96546        |
|                                               | 1                 | 0.04264                               | 0.93623        |
|                                               | 5                 | 0.04464                               | 0.80583        |
|                                               | 0                 | 0.11799                               | 0.97593        |
| Na <sub>2</sub> S <sub>2</sub> O <sub>3</sub> | 0.05              | 0.05005                               | 0.99575        |
|                                               | 0.1               | 0.00961                               | 0.99493        |
|                                               | 0.5               | 0.00484                               | 0.87008        |
|                                               | 1                 | 0.00331                               | 0.98793        |
|                                               | 2                 | 0.00387                               | 0.94419        |

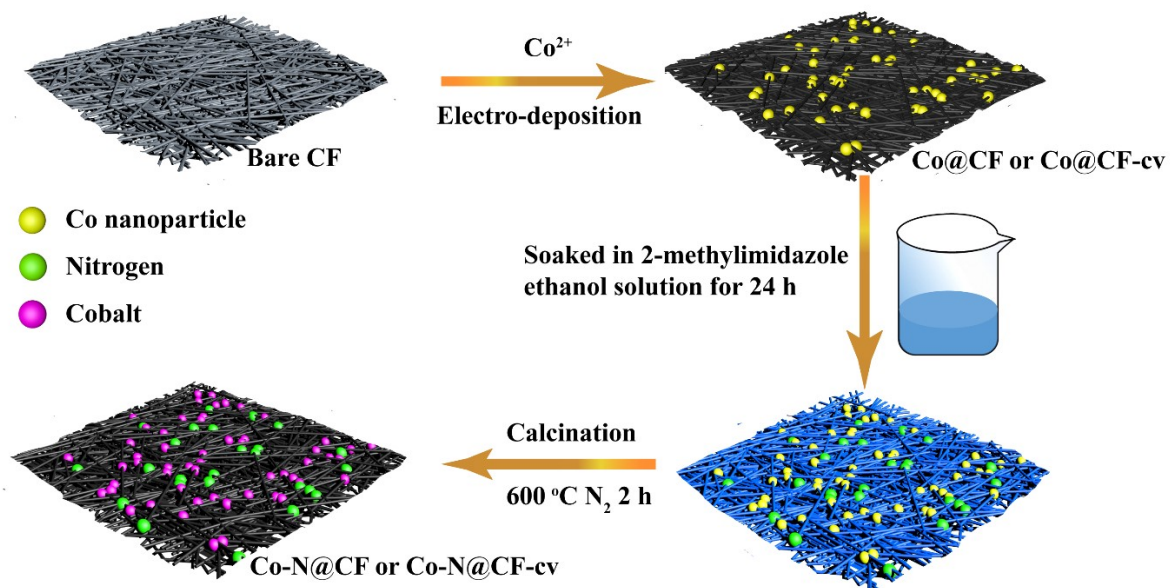

**Fig. S1** Schematic illustration of the synthesis of the Co-N@CF anode.



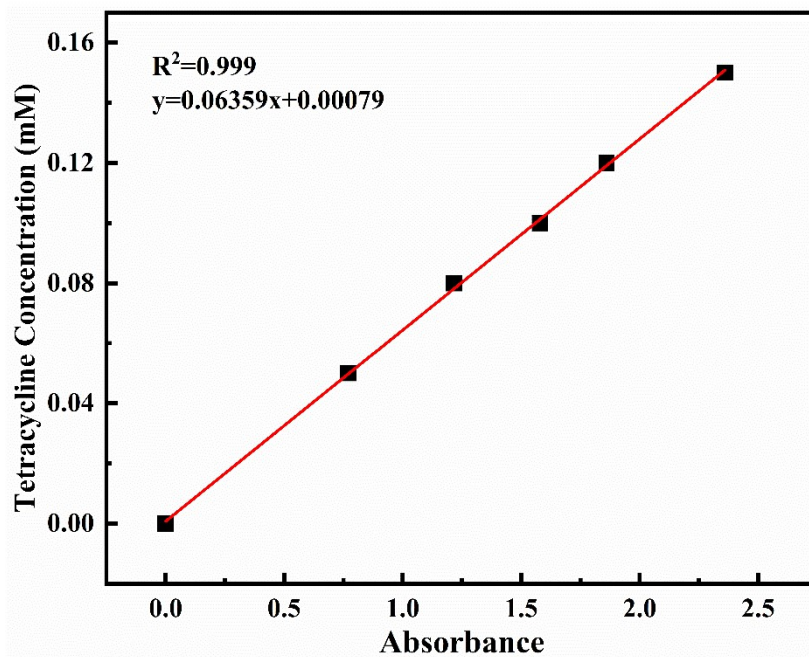

Fig. S2. The standard curve of concentration-absorbance of tetracycline.

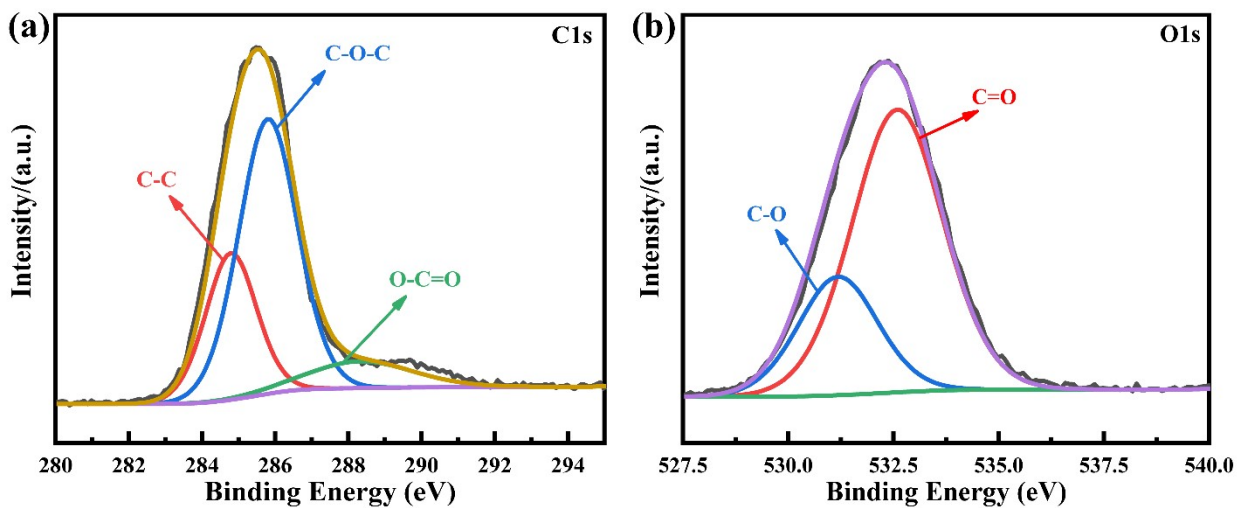

**Fig. S3.** The high XPS resolution spectrum of C 1s (a) and O 1s (b) of bare CF.

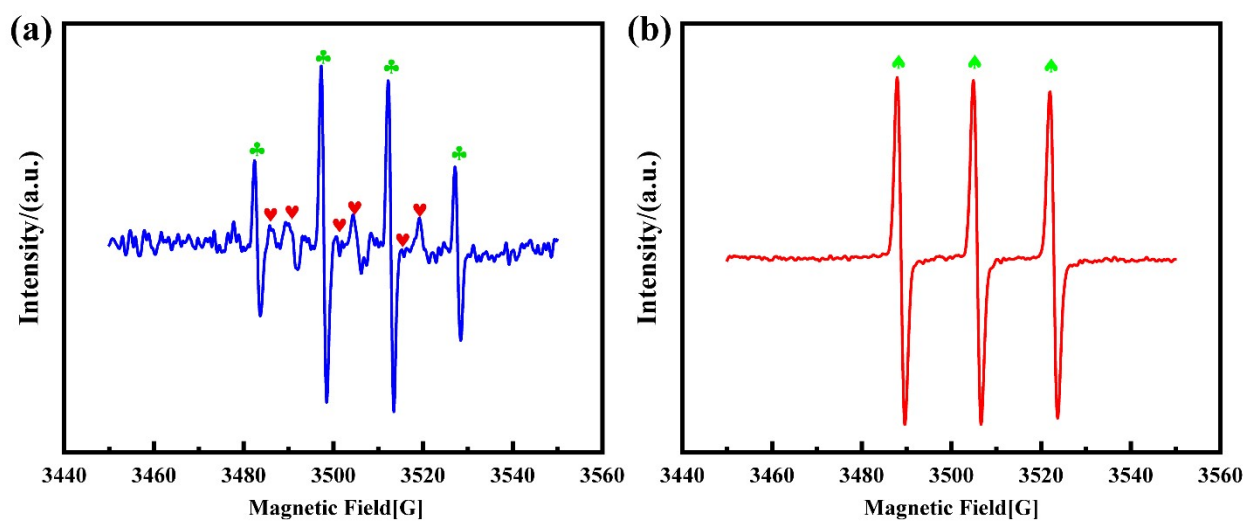

**Fig. S4.** EPR spectra of DMPO-OH $\cdot$  (♣), DMPO-SO $_4^{\cdot-}$  (♥) (a) and TMP- $^1$ O $_2$  (♣) (b) generated in EC/Co-N@CF process.

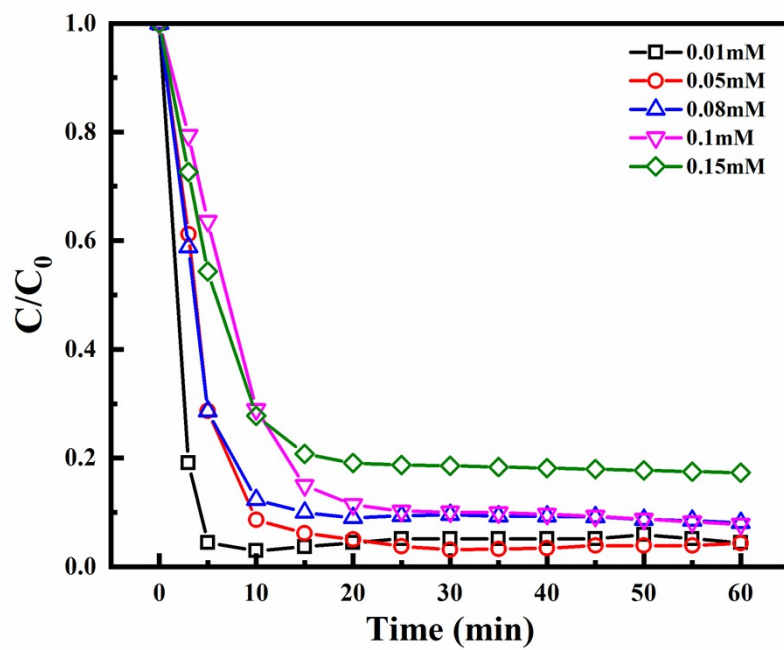

**Fig. S5.** Degradation efficiency of TC with effect of initial TC concentration.

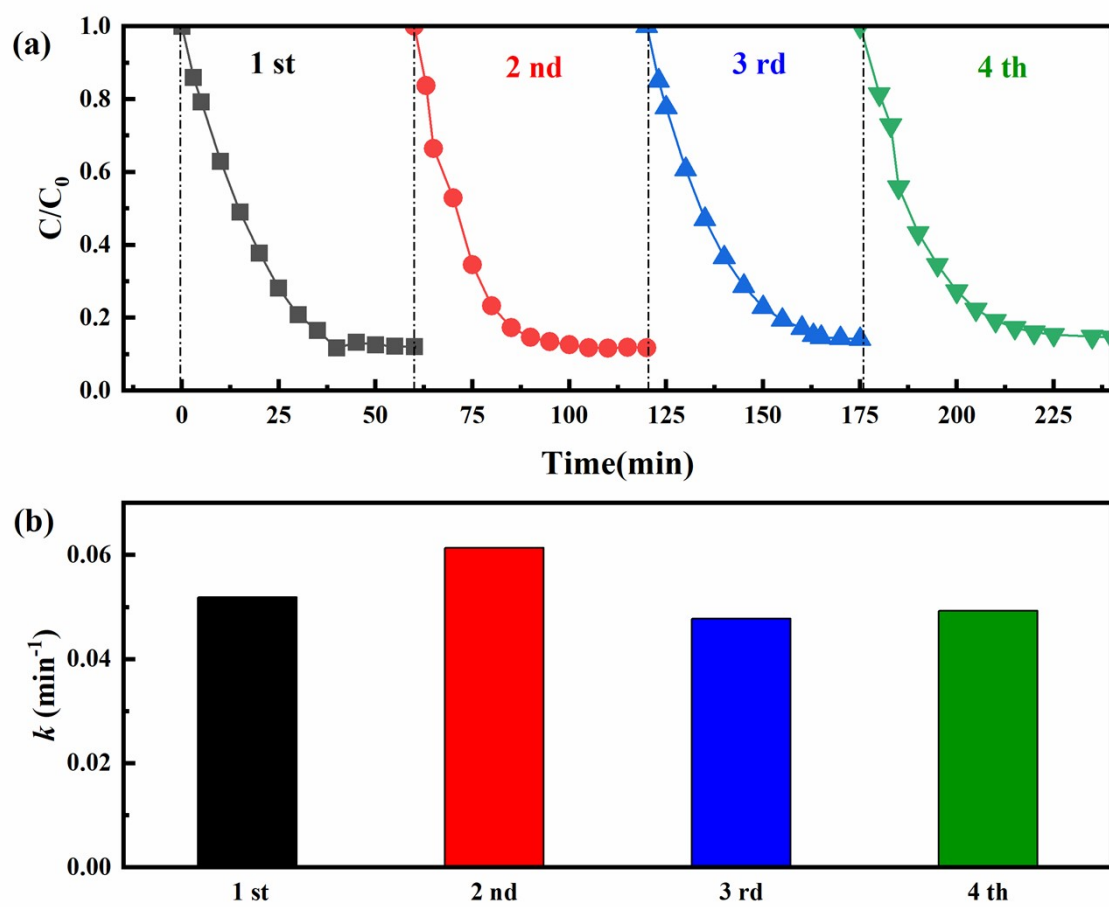

Fig. S6. The recyclability (a) and  $k$  (b) of Co-N@CF anode.

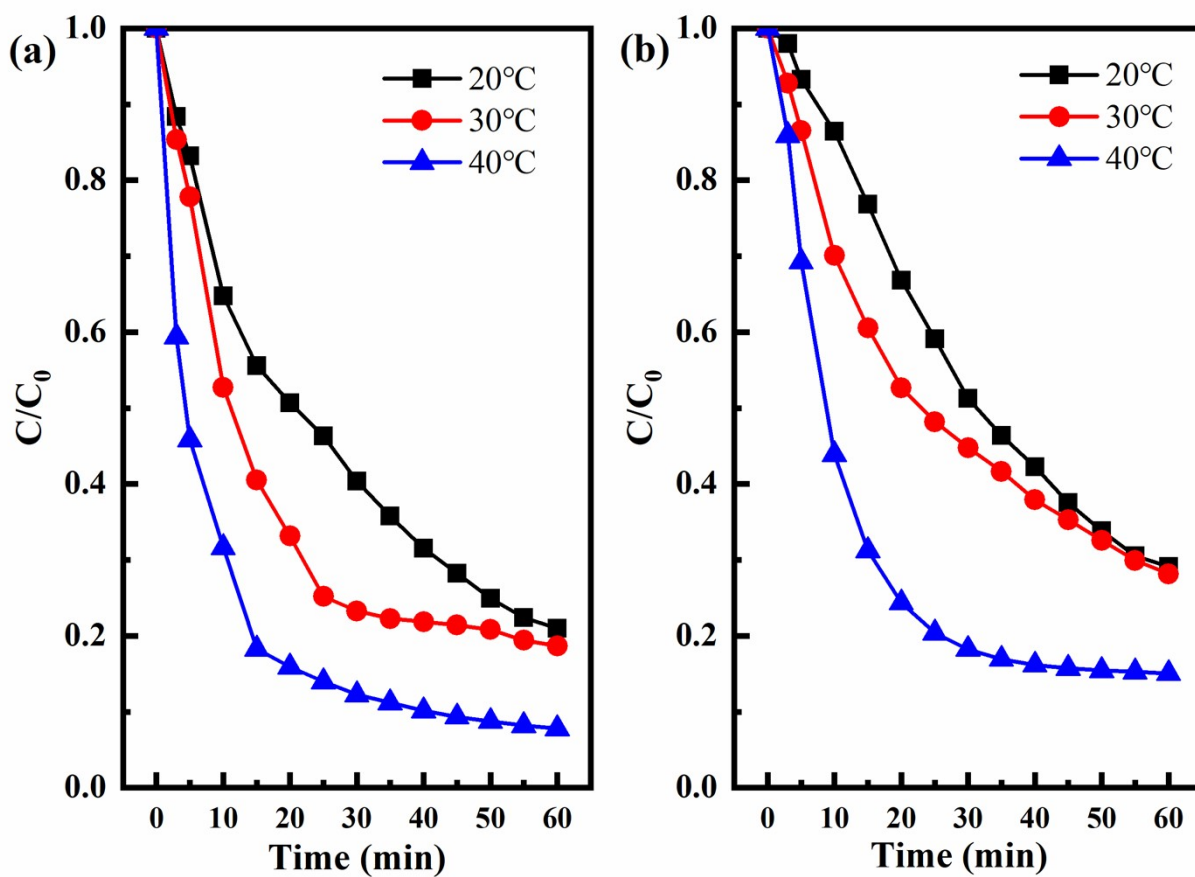

**Fig. S7** The linear fitted curve of the degradation results of EC/Co-N@CF (a) and Co-N@CF (b) processes at various temperature.

## References

1. Z. Liu, H. Ding, C. Zhao, T. Wang, P. Wang and D. D. Dionysiou, Electrochemical activation of peroxymonosulfate with ACF cathode: Kinetics, influencing factors, mechanism, and application potential, *Water Research*, 2019, **159**, 111-121.
2. J. Yao, Y. Zhang and Z. Dong, Enhanced degradation of contaminants of emerging concern by electrochemically activated peroxymonosulfate: Performance, mechanism, and influencing factors, *Chemical Engineering Journal*, 2021, **415**, 128938.
3. K. Wang, D. Huang, W. Wang, Y. Li and J. Niu, Enhanced decomposition of long-chain perfluorocarboxylic acids (C9C10) by electrochemical activation of peroxymonosulfate in aqueous solution, *Science of The Total Environment*, 2020, **758**, 143666.
4. J. Di, M. Zhu, R. Jamakanga, X. Gai, Y. Li and R. Yang, Electrochemical activation combined with advanced oxidation on NiCo<sub>2</sub>O<sub>4</sub> nanoarray electrode for decomposition of Rhodamine B, *Journal of Water Process Engineering*, 2020, **37**, 101386.
5. J. Li, Y. Ren, L. Lai and B. Lai, Electrolysis assisted persulfate with annular iron sheet as anode for the enhanced degradation of 2, 4-dinitrophenol in aqueous solution, *Journal of Hazardous Materials*, 2018, **344**, 778-787.
6. G. V. Buxton, C. L. Greenstock, W. P. Helman and A. B. Ross, Critical Review of rate constants for reactions of hydrated electrons, hydrogen atoms and hydroxyl radicals ( $\cdot\text{OH}/\cdot\text{O}^-$  in Aqueous Solution, *Journal of Physical and Chemical Reference Data*, 1988, **17**, 513-886.
7. P. Neta, R. E. Huie and A. B. Ross, Rate Constants for Reactions of Inorganic Radicals in Aqueous Solution, *Journal of Physical and Chemical Reference Data*, 1979, **17**, 1027-1284.
8. Yang, Yi, Banerjee, Gourab, Brudvig, Gary, W., Kim, Jae-Hong and Pignatello, Oxidation of Organic Compounds in Water by Unactivated Peroxymonosulfate, *Environmental Science & Technology*, 2018, **52**, 5911-5919.
9. C. Wei, B. Song, J. Yuan, Z. Feng, G. Jia and C. Li, Luminescence and Raman spectroscopic studies on the damage of tryptophan, histidine and carnosine by singlet oxygen, *Journal of Photochemistry and Photobiology A: Chemistry*, 2007, **189**, 39-45.
10. Y. Wang, D. Cao, M. Liu and X. Zhao, Insights into heterogeneous catalytic activation of peroxymonosulfate by Pd/g-C<sub>3</sub>N<sub>4</sub>: The role of superoxide radical and singlet oxygen, *Catalysis Communications*, 2017, **102**, 85-88.
